# Supplementary material for: Practice of switch from intravenous to oral antibiotics
Source: PubMed Central journal article supplement (PMC4320166; doi:10.1186/2193-1801-3-717), 2014-12-09

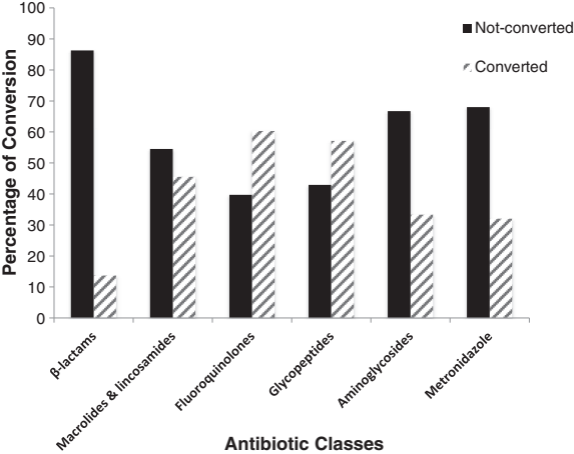

Supplement: 40064_2014_1490_MOESM2_ESM.pdf [file 40064_2014_1490_MOESM2_ESM.pdf]
